# Supplementary material for: UPEC Colonic-Virulence and Urovirulence Are Blunted by Proanthocyanidins-Rich Cranberry Extract Microbial Metabolites in a Gut Model and a 3D Tissue-Engineered Urothelium
Source: PubMed Central journal article supplement (PMC9603664; doi:10.1128/spectrum.02432-21), 2022-08-16
Supplement: spectrum.02432-21-s0001.pdf [file spectrum.02432-21-s0001.pdf]

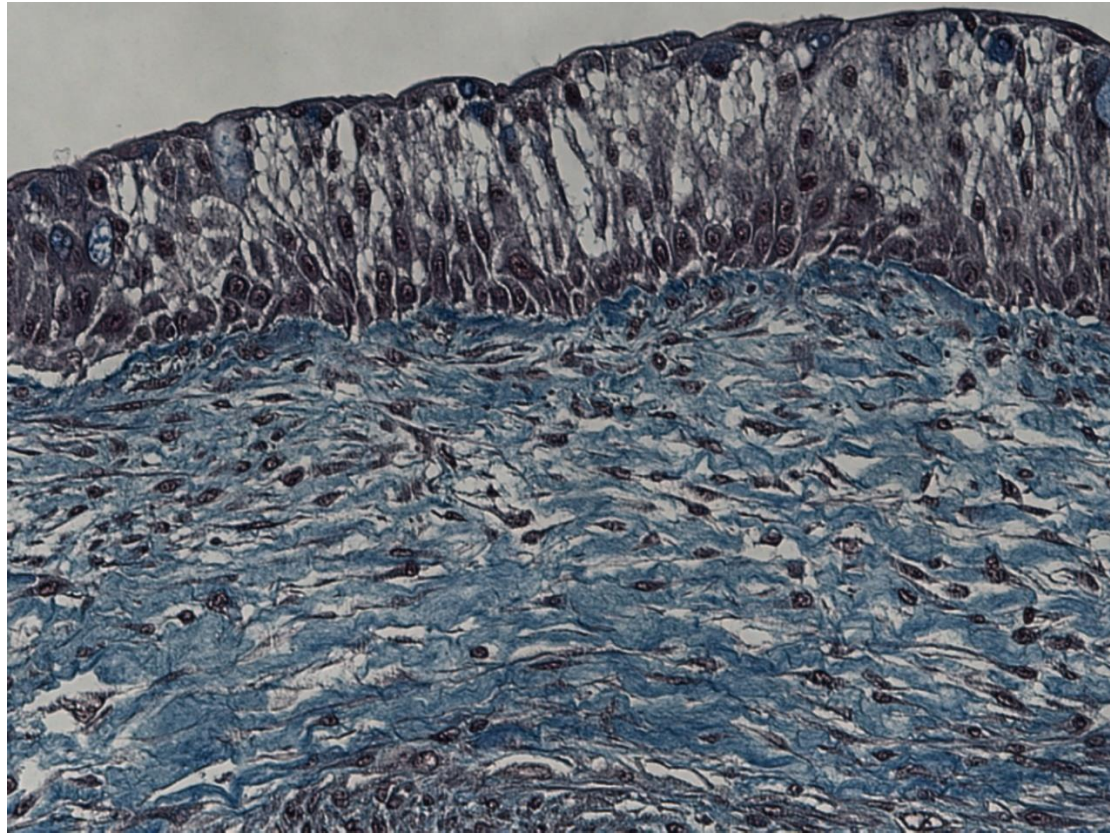

**Supplementary Figure 1. Histology of a 3D human tissue-engineered bladder mucosa.** Prior to UPEC infections, some tissues were fixed in formol 3.7% for 24h before to be included into paraffin. Tissues were sliced and stained using the Masson's trichrome protocol. The BMCs into the collagen gel formed the lamina propria whereas the BUCs seeded on the stromal part formed the urothelium. The three layers of the epithelium can be distinguished: basal lamina, intermediate cells (racket morphology) and umbrella cells (flat cells on the top).

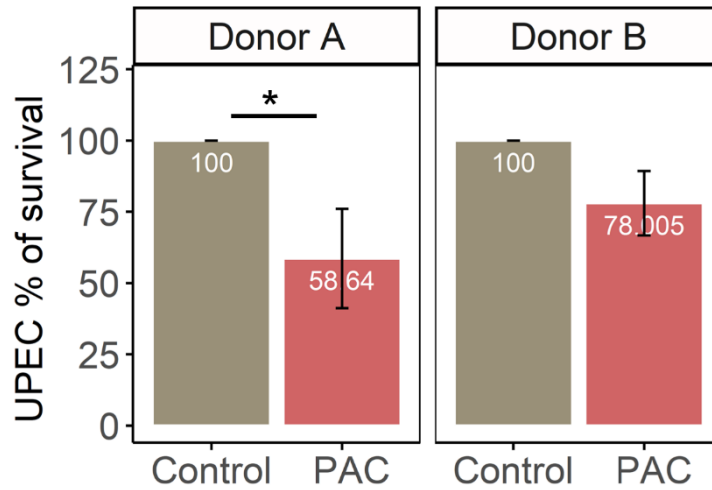

**Supplementary Figure 2.** Percentage of viable-culturable UPEC remaining in the dialysis cassettes after a 2-hour exposure with the PAC treated/non-treated metabolome of the transverse colon. Significant differences between PAC treatment and control are indicated with  $p \leq 0.05$  (\*), as determined by the Friedman post-hoc Wilcoxon test.

**Supplementary Table 1. Characterization of PAC-rich cranberry extract by UPLC-UV-QToF and HPLC-UV**

|                      | Analyte                              | Concentration (mg/g)<br>(mean ± standard deviation) |      |        |
|----------------------|--------------------------------------|-----------------------------------------------------|------|--------|
| <i>Phenolic acid</i> | Coumaric acid                        | 1,285                                               | ±    | 0,018  |
|                      | Coumaroyl-dihydromonotropein         | 0,754                                               | ±    | 0,009  |
|                      | Chlorogenic acid                     | 1,92                                                | ±    | 0,03   |
|                      | Coumaroyl-hexoside - 1               | 0,333                                               | ±    | 0,005  |
|                      | Coumaroyl-hexoside - 2               | 0,182                                               | ±    | 0,003  |
|                      | Caffeoyl-hexoside                    | 0,172                                               | ±    | 0,002  |
|                      | Sinapoyl-hexoside                    | 0,352                                               | ±    | 0,006  |
|                      | Coumaroyl-monotropein                | 0,372                                               | ±    | 0,006  |
|                      | Vanilloyl-hexoside                   | 0,0533                                              | ±    | 0,0009 |
|                      | Feruloyl-hexoside                    | 0,209                                               | ±    | 0,003  |
|                      | 3,4-dihydroxybenzoic acid            | ND                                                  | ±    | ND     |
|                      | Hydroxybenzoyl-hexosyl-hexoside      | 0,1247                                              | ±    | 0,0019 |
|                      | Dihydroxybenzoic acid - 2            | 0,116                                               | ±    | 0,004  |
|                      | Dihydroxybenzoic acid - 3            | 0,0501                                              | ±    | 0,0006 |
|                      | Dihydroxybenzoyl-hexoside            | ND                                                  | ±    | ND     |
|                      | Phenolic acids and derivatives total | 5,93                                                | ±    | 0,09   |
| <i>Flavonols</i>     | Quercetin                            | 2,9                                                 | ±    | 0,04   |
|                      | Myricetin                            | 1,52                                                | ±    | 0,02   |
|                      | Quercetin-3-galactoside              | 0,348                                               | ±    | 0,005  |
|                      | Quercetin-3-rhamnoside               | 0,783                                               | ±    | 0,011  |
|                      | Myricetin-hexoside                   | 0,145                                               | ±    | 0,002  |
|                      | Quercetin-pentoside - 1              | 0,54                                                | ±    | 0,03   |
|                      | Quercetin-pentoside - 2              | 0,352                                               | ±    | 0,007  |
|                      | Quercetin-pentoside - 3              | 0,827                                               | ±    | 0,013  |
|                      | Quercetin-hydroxybenzoyl-hexoside    | 0,279                                               | ±    | 0,004  |
|                      | Isorhamnetin                         | 0,223                                               | ±    | 0,003  |
|                      | Myricetin-pentoside 1                | 0,0865                                              | ±    | 0,0017 |
|                      | Syringetin-hexoside                  | 0,193                                               | ±    | 0,003  |
|                      | Myricetin methyl                     | 0,124                                               | ±    | 0,002  |
|                      | Myricetin-pentoside - 2              | 0,1307                                              | ±    | 0,0014 |
|                      | Myricetin-pentoside - 3              | 0,321                                               | ±    | 0,007  |
|                      | Quercetin-deoxyhexoside              | 0,1034                                              | ±    | 0,0017 |
| Flavonols total      | 8,87                                 | ±                                                   | 0,15 |        |

|                    |                              |       |   |       |
|--------------------|------------------------------|-------|---|-------|
| <i>Anthocyanes</i> | Cyanidin-3-galactoside       | 0,034 | ± | 0,003 |
|                    | Cyanidin-3-glucoside         | 0,069 | ± | 0,006 |
|                    | Cyanidin-3-arabinoside       | 0,75  | ± | 0,03  |
|                    | Peonidin-3-galactoside       | 0,063 | ± | 0,006 |
|                    | Peonidin-3-glucoside         | 0,156 | ± | 0,006 |
|                    | Peonidin-3-arabinoside       | 0,577 | ± | 0,017 |
|                    | Anthocyanes totaux           | 1,65  | ± | 0,07  |
| <i>PAC</i>         | Catechin                     | 0,182 | ± | 0,004 |
|                    | Epicatechin                  | 1,31  | ± | 0,02  |
|                    | Flavan-3-ols total           | 1,49  | ± | 0,02  |
|                    | Procyanidin A2               | 3,19  | ± | 0,06  |
|                    | Procyanidin B2               | ND    | ± | ND    |
|                    | Trimer PAC A-Type (1x A) - 1 | 0,96  | ± | 0,02  |
|                    | Trimer PAC A-Type (1x A) - 2 | 1,55  | ± | 0,03  |
|                    | Trimer PAC B-Type - 1        | 6,65  | ± | 0,1   |
|                    | Trimer PAC B-Type - 2        | 1,32  | ± | 0,02  |
|                    | PAC total *                  | 70,9  | ± | 1,6   |
|                    | Flavan-3-ols + PAC total     | 72,4  | ± | 1,6   |
|                    | Mean DP *                    | 6     | ± | 0,013 |

\* *Determined by phloroglucinolysis.*

**Supplementary Table 2. UPEC primers specific to the UTI-89 strain SLC719**

|                          | <b>Gene<br/>s</b> | <b>Genbank<br/>accession<br/>number</b> | <b>Primers</b>              | <b>Tm</b> | <b>Amplico<br/>n size</b> | <b>Referenc<br/>e</b> |
|--------------------------|-------------------|-----------------------------------------|-----------------------------|-----------|---------------------------|-----------------------|
| <b>Adhesins-Invasins</b> | <i>fimH</i>       | CP000243.<br>1                          | F-<br>GTGCCAATTCCTCTTACCGTT | 60°<br>C  | 164 pb                    | Hojati et<br>al. 2015 |
|                          |                   | Locus 903<br>pb                         | R-<br>TGAATAATCGTACCGTTGCG  |           |                           |                       |
|                          |                   |                                         |                             |           |                           |                       |
|                          | <i>eaeH</i>       | CP000243.<br>1                          | F-<br>AGTAACCGTGGTGGCTGATG  | 60°<br>C  | 131 pb                    | This<br>study         |
|                          |                   | Locus 4251<br>pb                        | R-<br>CACTGATAGCGTTGCCATGC  |           |                           |                       |
|                          |                   |                                         |                             |           |                           |                       |
|                          | <i>sfa</i>        | CP000243.<br>1                          | F-<br>GCTGCAAATACGCACTGACC  | 60°<br>C  | 199 pb                    | This<br>study         |
|                          |                   | Locus 264<br>pb                         | R-<br>AAGGTGTTGGTTCCCGGTAC  |           |                           |                       |
|                          |                   |                                         |                             |           |                           |                       |
|                          | <i>papG</i>       | CP000243.<br>1                          | F-<br>TTCACCATAGAGGCGACTGC  | 59°<br>C  | 130 pb                    | This<br>study         |
|                          |                   | Locus 961<br>pb                         | R-<br>TTCGGTTGGTCTGGGTCATG  |           |                           |                       |
|                          |                   |                                         |                             |           |                           |                       |
|                          | <i>csgA</i>       | CP000243.<br>1                          | F- TCTGGCAGGTGTTGTTCTC      | 60°<br>C  | 119 pb                    | This<br>study         |
|                          |                   | Locus 421<br>pb                         | R-<br>CAAGAGCAGAGTTACCGCCA  |           |                           |                       |
|                          |                   |                                         |                             |           |                           |                       |
| <b>Toxi<br/>ns</b>       | <i>hlyA</i>       | CP000243.                               | F-<br>GCAAATAAATTGCACTCAGCA | 58°       | 142 pb                    | Madelung<br>et al.    |

|  |             |                  |                                  |          |        |               |
|--|-------------|------------------|----------------------------------|----------|--------|---------------|
|  |             | 1                | G                                | C        |        | 2017          |
|  |             | Locus 3061<br>pb | R-<br>CAAGGTCATTAAGGCTTGAAC<br>C |          |        |               |
|  |             |                  |                                  |          |        |               |
|  | <i>cnf1</i> | CP000243.<br>1   | F-<br>GGTATTCCGACGGGAGCATT       | 60°<br>C | 149 pb | This<br>study |
|  |             | Locus 3001<br>pb | R-<br>ACTGACACTCACTCAAGCCG       |          |        |               |
|  |             |                  |                                  |          |        |               |

**Supplementary Table 3. UPEC metallophores identification - positive ionisation**

| <b>Compound</b>                   | <b>RT Synapt (min)</b> | <b>[M+H]<sup>+</sup>, m/z detected (Synapt)</b> | <b>RT Fusion (min)</b> | <b>[M+H]<sup>+</sup>, m/z detected (Fusion)</b> | <b>Mass accuracy (mDa)</b> | <b>MS<sup>2</sup> fragments, m/z (Relative intensity)</b>      | <b>Identification level</b> |
|-----------------------------------|------------------------|-------------------------------------------------|------------------------|-------------------------------------------------|----------------------------|----------------------------------------------------------------|-----------------------------|
| <b>Yersianiabactin - Isomer 1</b> | 10,24                  | 482,1243                                        | 11,59                  | 482,1237                                        | -0,5                       | 295.0573 (100) ; 190.0323 (42) ; 114.0370 (8)                  | 2                           |
| <b>Yersianiabactin - Isomer 2</b> | 10,48                  | 482,1242                                        | 11,89                  | 482,1239                                        | -0,3                       | 295.0570 (100) ; 190.0322 (49)                                 | 2                           |
| <b>Yersianiabactin-Fe(III)</b>    | 8,4                    | 535,0359                                        | 10,08                  | 535,0355                                        | -0,1                       | 302.9889 (100) ; 201.9620 (96) ; 188.0740 (77) ; 348.9767 (43) | 2                           |
| <b>Enterobactin</b>               | 8,85                   | 670,1482                                        | 10,56                  | 670,1516                                        | -0,4                       | 224.0553 (100) ; 137.0231 (33) ; 447.1042 (23)                 | 2                           |

\*Mass accuracy and MS<sup>2</sup> fragments are from Fusion data.

**Supplementary Table 4. PAC metabolites and flavonol identification - negative ionisation**

| Class           | Compound                                                        | RT<br>Synap<br>t<br>(min) | [M-H] <sup>-</sup> ,<br><i>m/z</i><br><i>detected</i><br>(Synapt) | Mass<br>accurac<br>y (mDa)          | MS <sup>2</sup> fragments, <i>m/z</i> (Relative<br>intensity) | Identificatio<br>n level |
|-----------------|-----------------------------------------------------------------|---------------------------|-------------------------------------------------------------------|-------------------------------------|---------------------------------------------------------------|--------------------------|
| PAC metabolites | Benzoic acid                                                    | 7,19                      | 121,0292                                                          | 0,2                                 | ID confirmed by analytical standard                           | 1                        |
|                 | 2-hydroxybenzoic acid                                           | 7,57                      | 137,0242                                                          | 0,3                                 | ID confirmed by analytical standard                           | 1                        |
|                 | 3,4-dihydroxybenzoic acid                                       | 3,89                      | 153,0192                                                          | 0,4                                 | ID confirmed by analytical standard                           | 1                        |
|                 | 3,5-dihydroxybenzoic acid                                       | 3,81                      | 153,0192                                                          | 0,4                                 | ID confirmed by analytical standard                           | 1                        |
|                 | 2-(4'-hydroxyphenyl)acetic acid                                 | 5,04                      | 151,0397                                                          | 0,2                                 | ID confirmed by analytical standard                           | 1                        |
|                 | 3-(3'-hydroxyphenyl)propanoic acid                              | 6,28                      | 165,0553                                                          | 0,2                                 | ID confirmed by analytical standard                           | 1                        |
|                 | 3-(4'-hydroxyphenyl)propanoic acid                              | 5,87                      | 165,0553                                                          | 0,2                                 | ID confirmed by analytical standard                           | 1                        |
|                 | 3-(3',4'-dihydroxyphenyl)propanoic acid                         | 4,91                      | 181,0501                                                          | 0                                   | ID confirmed by analytical standard                           | 1                        |
|                 | 5-(3'-hydroxyphenyl)valeric acid                                | 8,23                      | 193,0868                                                          | -0,2                                | ID confirmed by analytical standard                           | 1                        |
|                 | 5-(3',4'-dihydroxyphenyl)valeric acid                           | 6,89                      | 209,0814                                                          | -0,1                                | ID confirmed by analytical standard                           | 1                        |
|                 | 5-(3',4'-dihydroxyphenyl)- $\gamma$ -valerolactone              | 5,83                      | 207,0653                                                          | -0,4                                | ID confirmed by analytical standard                           | 1                        |
|                 | 1-(Hydroxyphenyl)-3-(2'',4'',6''-trihydroxyphenyl)-2-propanol   | 6,36                      | 275,0917                                                          | -0,2                                | 123.0448 (100) ; 135.0449 (43) ; 151.0398 (25)                | 2                        |
|                 | 1-(Dihydroxyphenyl)-3-(2'',4'',6''-trihydroxyphenyl)-2-propanol | 5,33                      | 291,0868                                                          | -0,1                                | 137.0242 (100)                                                | 2                        |
|                 | Catechin                                                        | 5,24                      | 289,0710                                                          | -0,2                                | ID confirmed by analytical standard                           | 1                        |
|                 | Epicatechin                                                     | 4,77                      | 289,0704                                                          | -0,8                                | ID confirmed by analytical standard                           | 1                        |
|                 | Procyanidin A1                                                  | 5,91                      | 575,1194                                                          | 0,4                                 | ID confirmed by analytical standard                           | 1                        |
|                 | Procyanidin A2                                                  | 6,41                      | 575,1207                                                          | 1,7                                 | ID confirmed by analytical standard                           | 1                        |
| Procyanidin B1  | 4,27                                                            | 577,1367                  | 2,1                                                               | ID confirmed by analytical standard | 1                                                             |                          |
| Procyanidin B2  | 4,92                                                            | 577,1366                  | 2                                                                 | ID confirmed by analytical standard | 1                                                             |                          |



|                 |           |      |         |      |                                     |   |
|-----------------|-----------|------|---------|------|-------------------------------------|---|
| <b>Flavonol</b> | Quercetin | 8,43 | 301,034 | -0,8 | ID confirmed by analytical standard | 1 |
|-----------------|-----------|------|---------|------|-------------------------------------|---|

\*Mass accuracy and MS2 fragments are from Synapt data.
